# Supplementary material for: PD-L1 lncRNA splice isoform promotes lung adenocarcinoma progression via enhancing c-Myc activity
Source: PubMed Central journal article supplement (PMC8042710; doi:10.1186/s13059-021-02331-0), 2021-04-13

**Figure 1A**

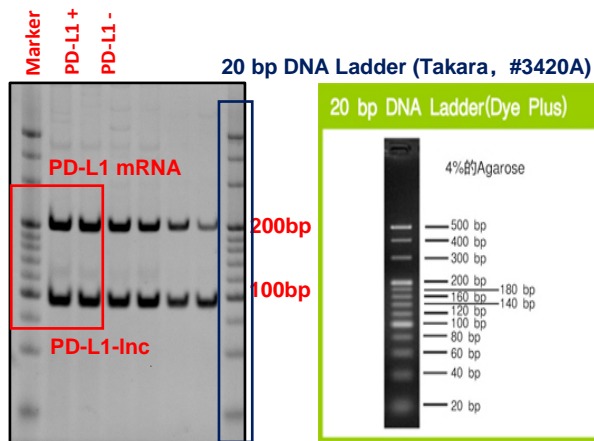

**Figure 1D**

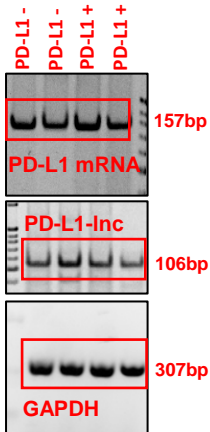

**Figure 1B**

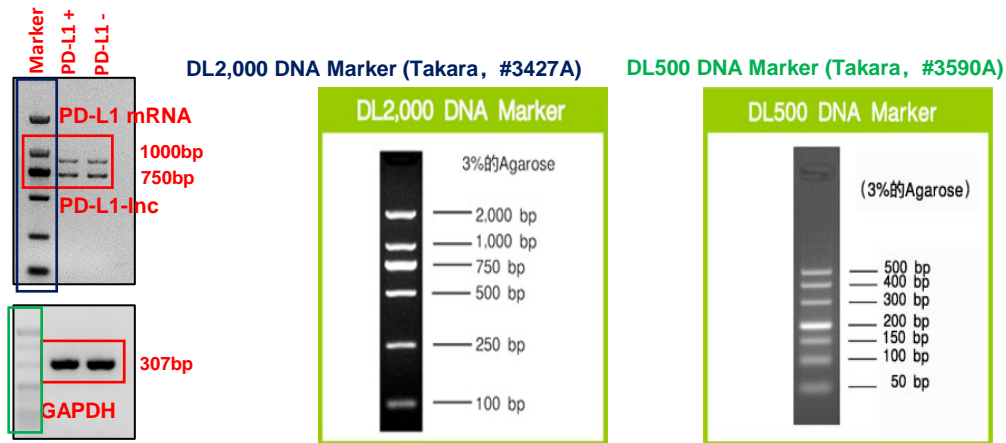

**Figure 2A**

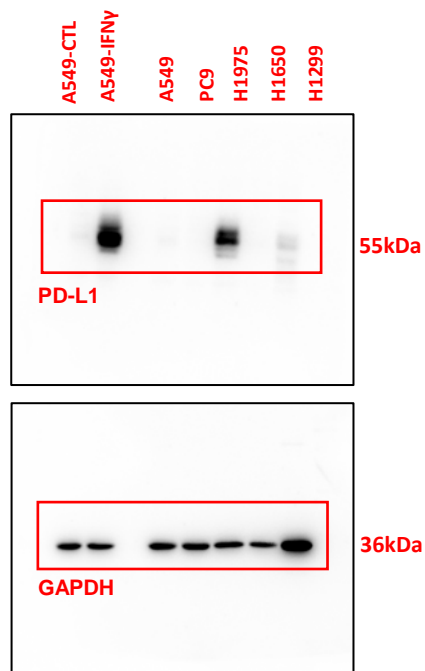

**Figure 2C**

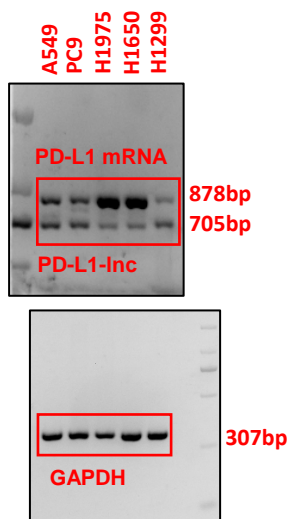

**Figure 2E**

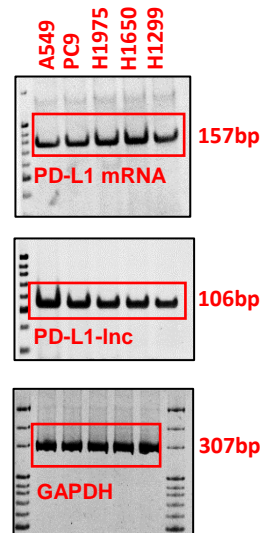

**Figure 3B**

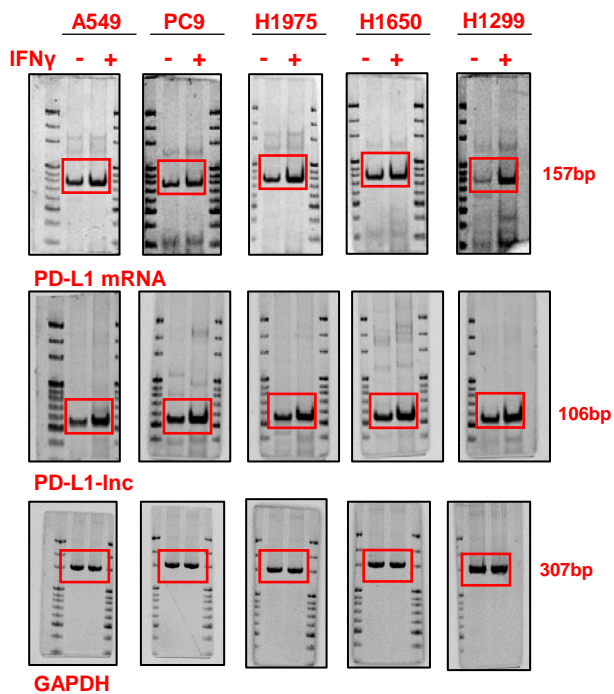

**Figure 3C**

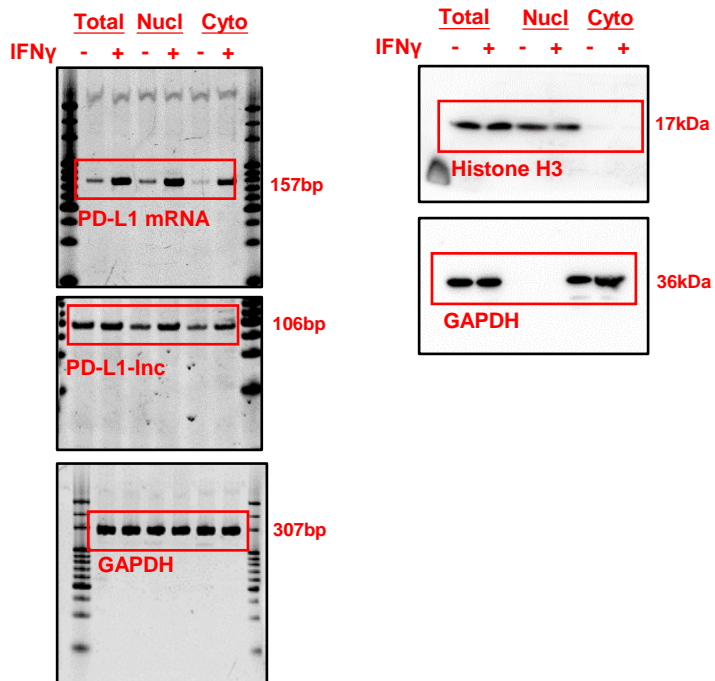

**Figure 5C**

**30 days**

CTL Vector

PD-L1-Inc

PD-L1-Inc shRNA

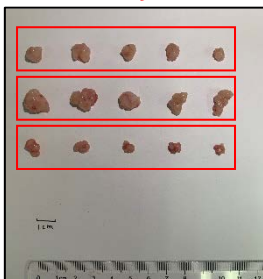

**Figure 5E**

CTL Vector PD-L1-Inc PD-L1-Inc shRNA

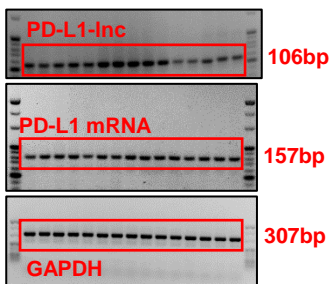

**Figure 6D**

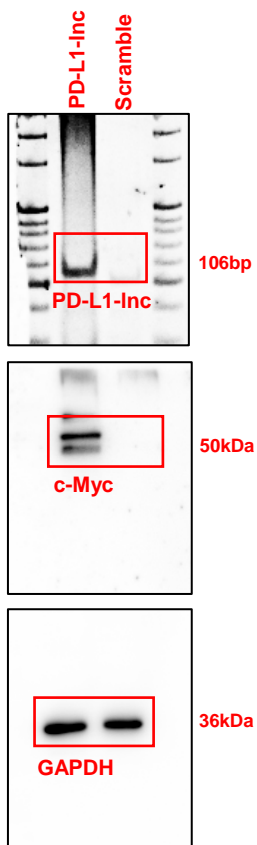

**Figure 6E**

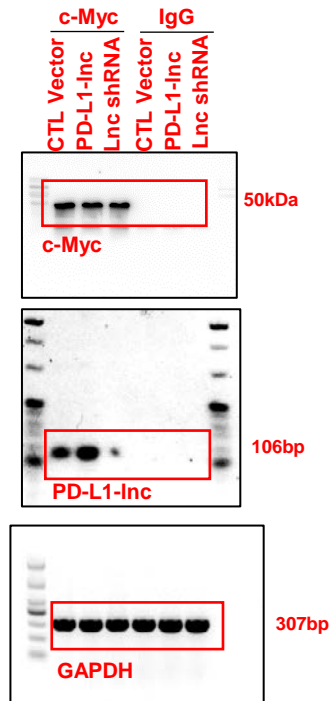

**Figure 7C**

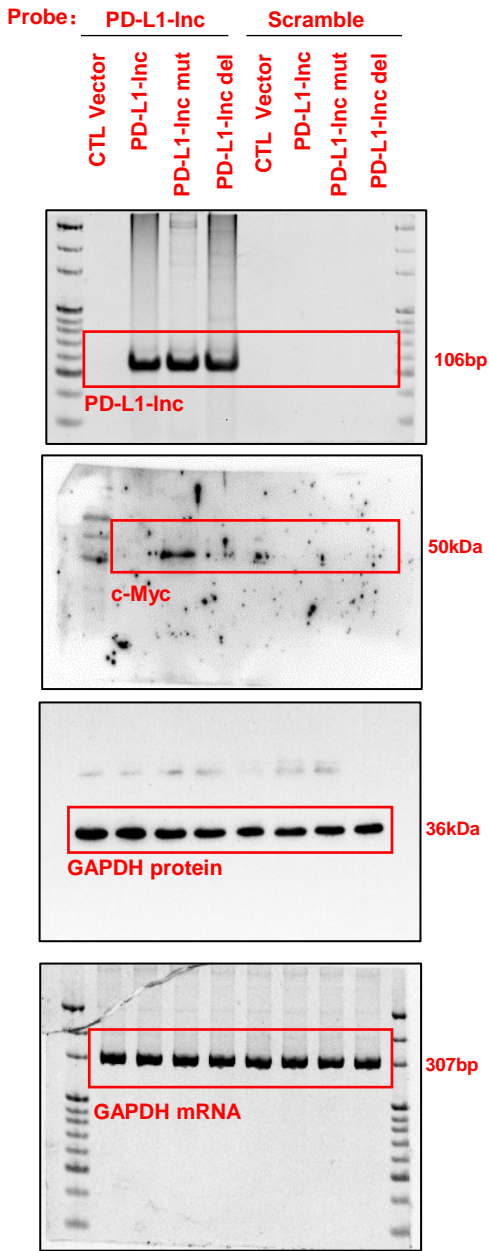

**Figure 7D**

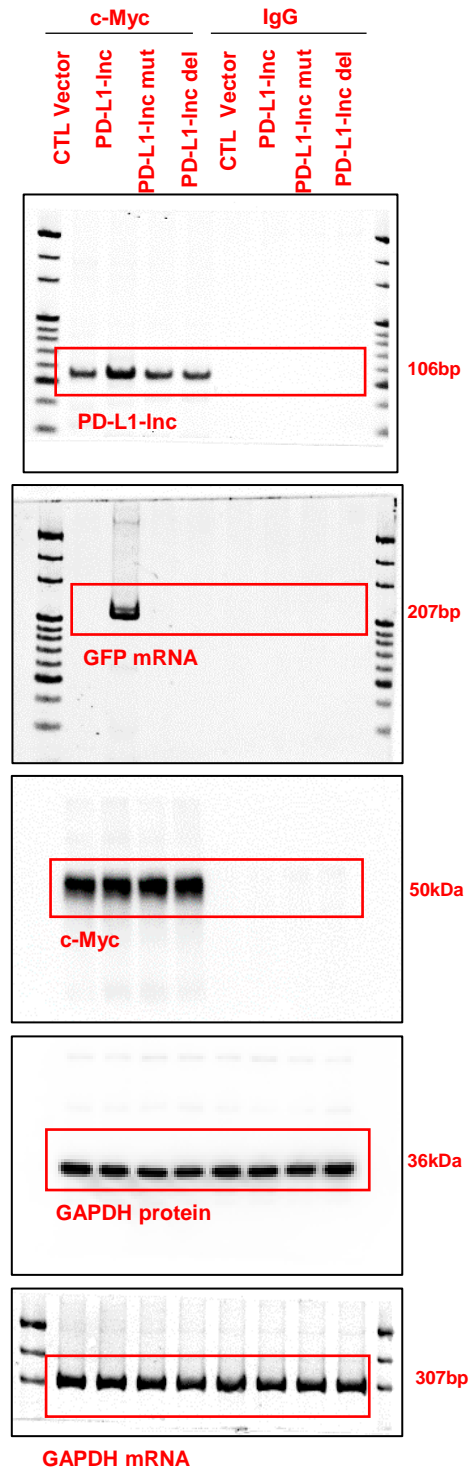

Figure 7E

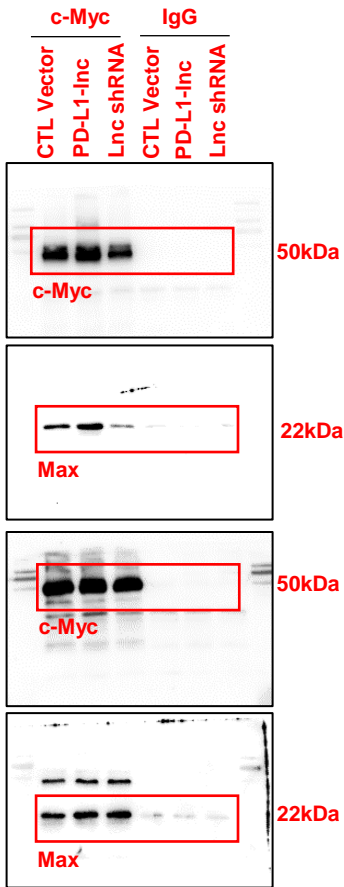

Figure 7G

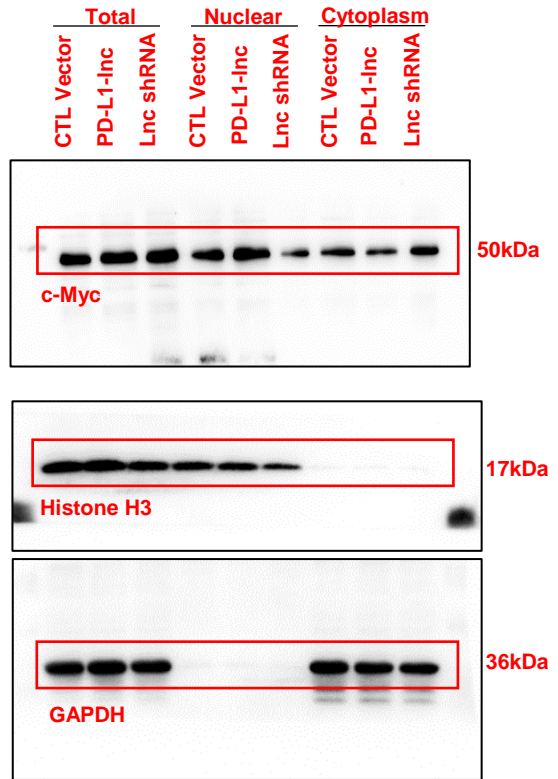

**Fig.S4C**

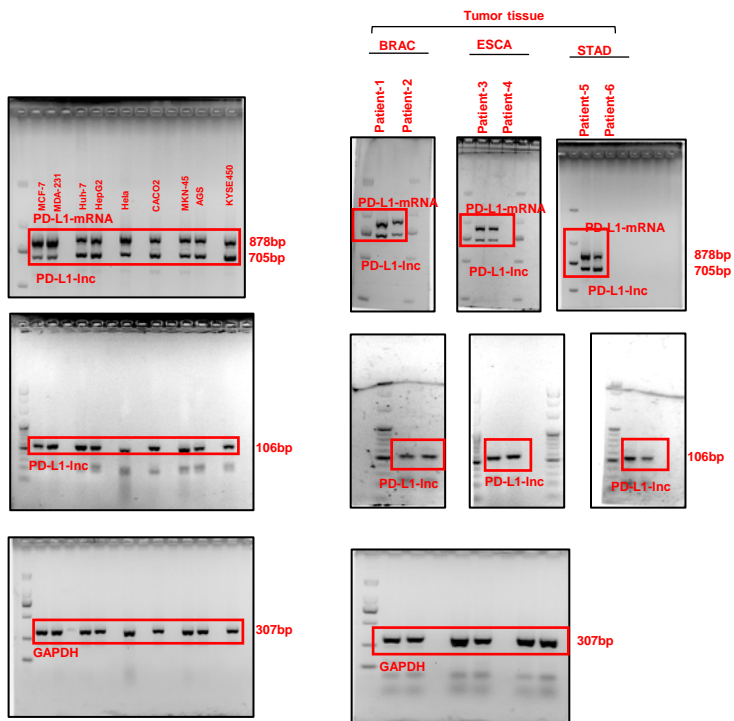



**Fig.S5A**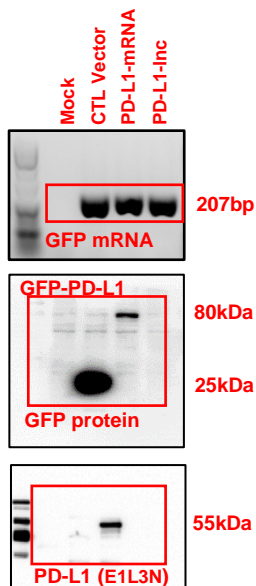**PD-L1 (E1L3N)**

Catalog Number:#13684 (CST)

Specificity/Sensitivity: PD-L1 (E1L3N®) XP® Rabbit

mAb recognizes endogenous levels of total PD-L1 protein.

Source/Purification: Monoclonal antibody is produced by immunizing animals with a synthetic peptide corresponding to residues near the carboxy terminus of human PD-L1 protein.

**PD-L1 (2B11D11)**

Catalog Number:66248-1-Ig (Proteintech)

CloneNo.:

2B11D11

Immunogen:

PD-L1/CD274 fusion protein Ag12443

**Fig.S5C**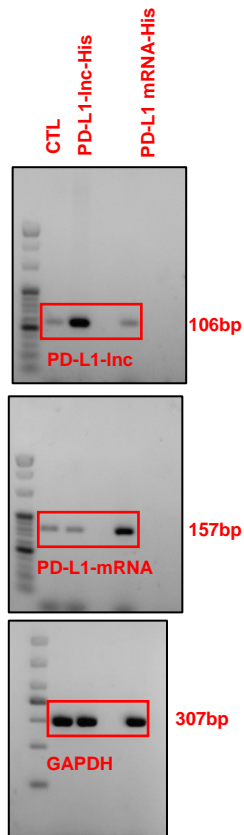**Fig.S5D**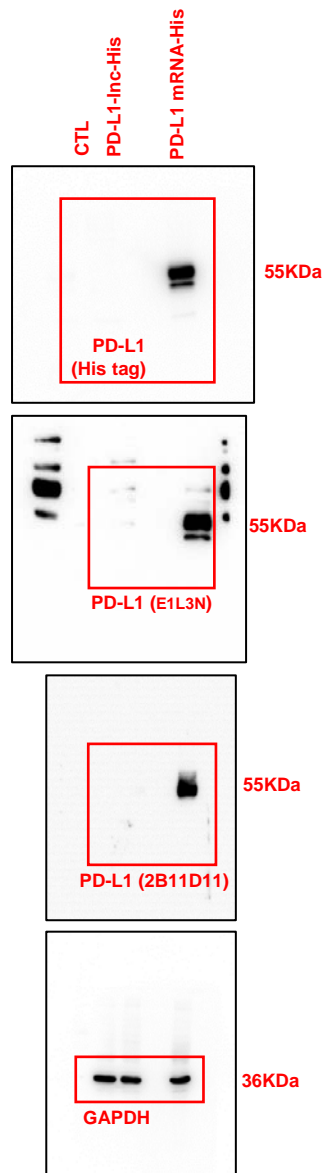

Fig. S6A

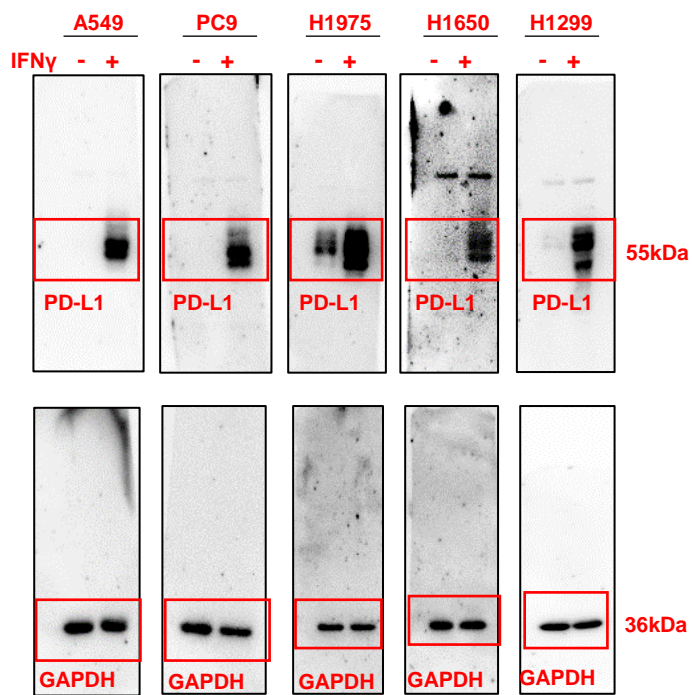

**Fig. S7E**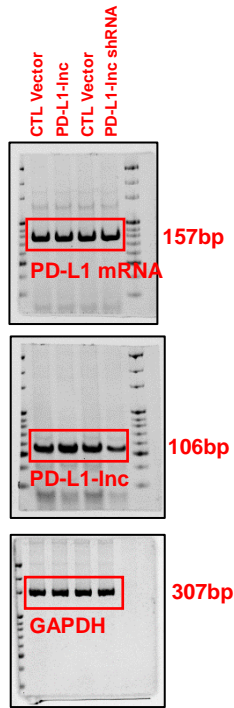**Fig. S7F**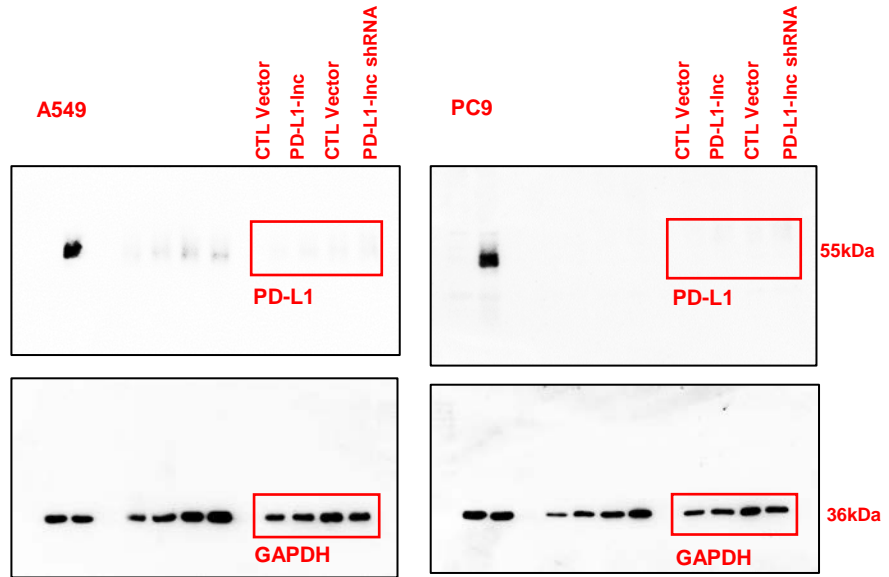**Fig. S7J**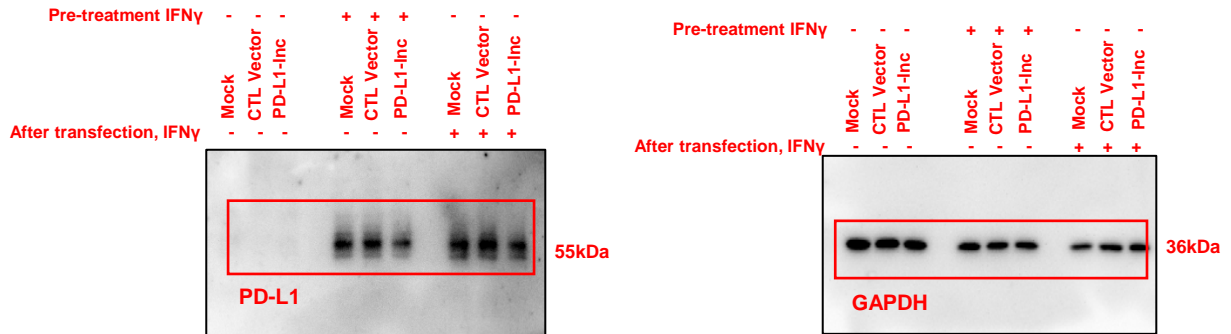

Fig. S9B

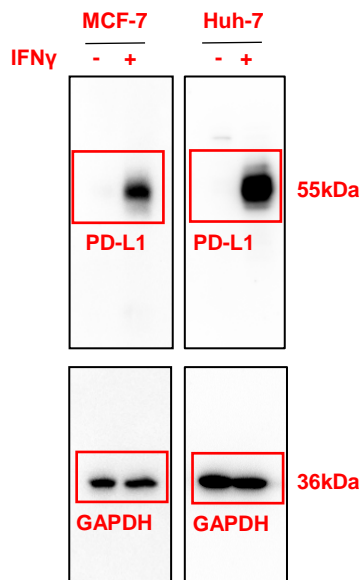

Fig. S9C

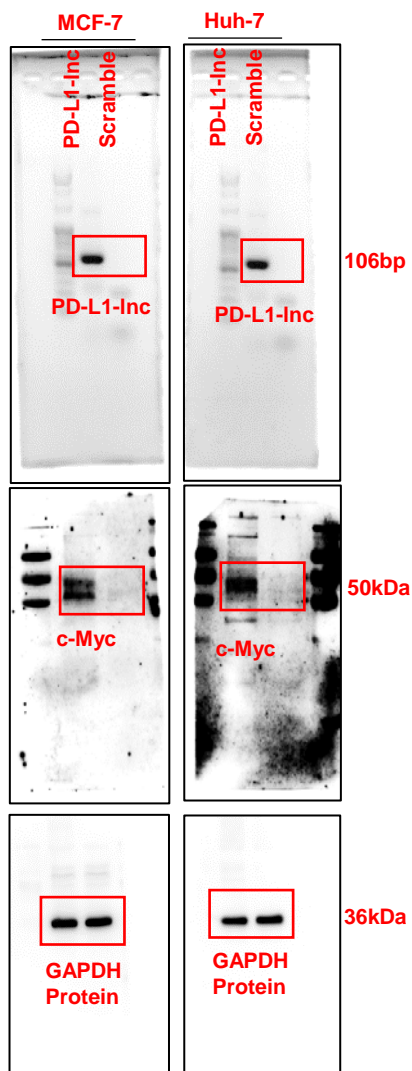

Fig. S9D

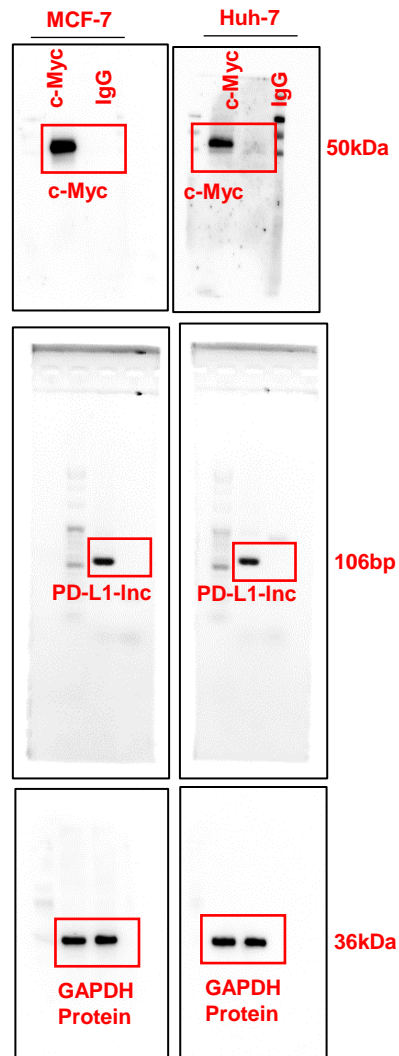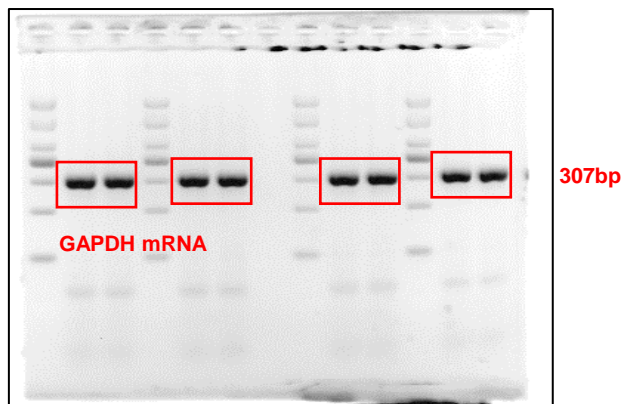

**Fig. S11A**

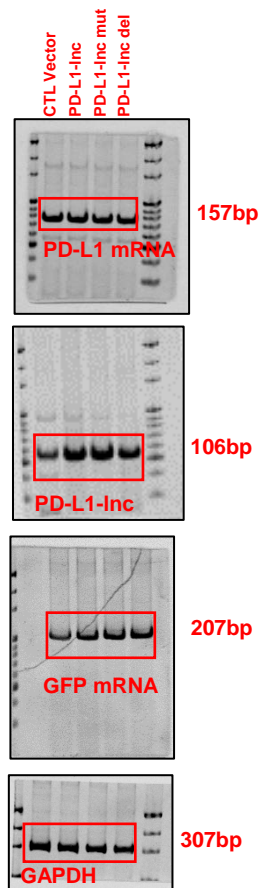

**Fig. S11B**

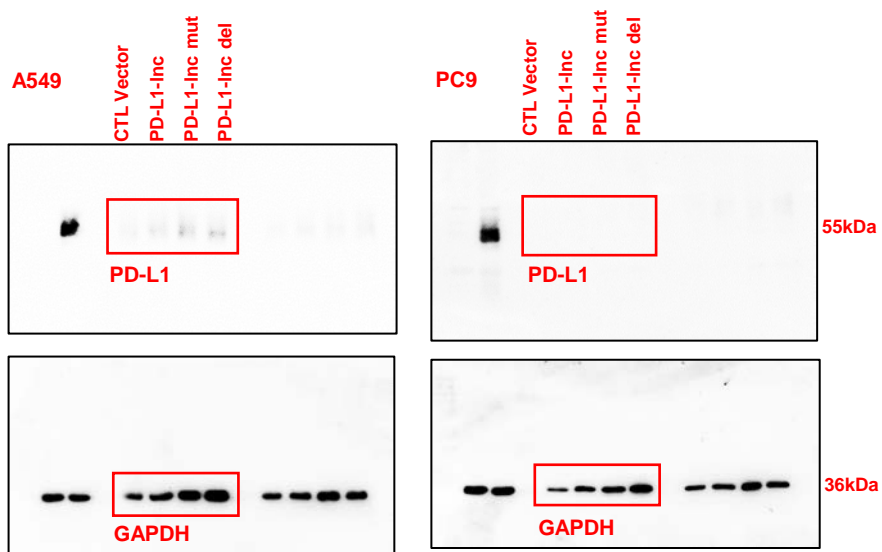

**Figure S12A**

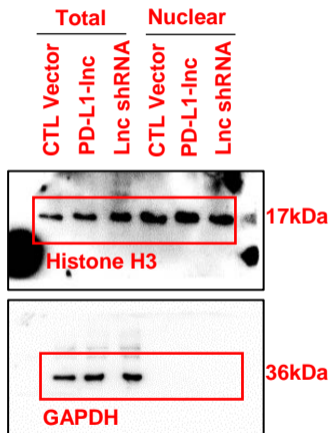

**Figure S12B**

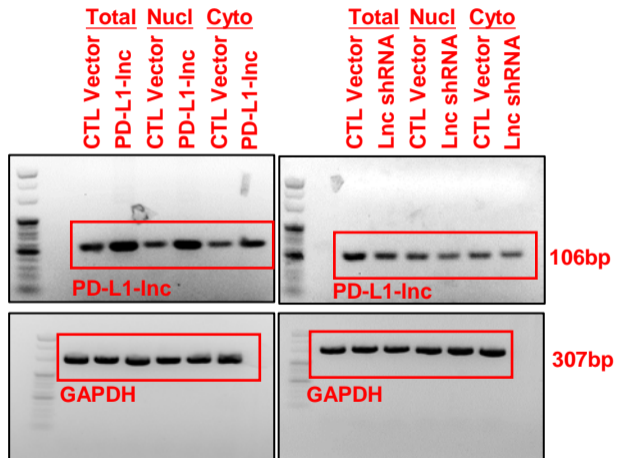

Fig.S13A

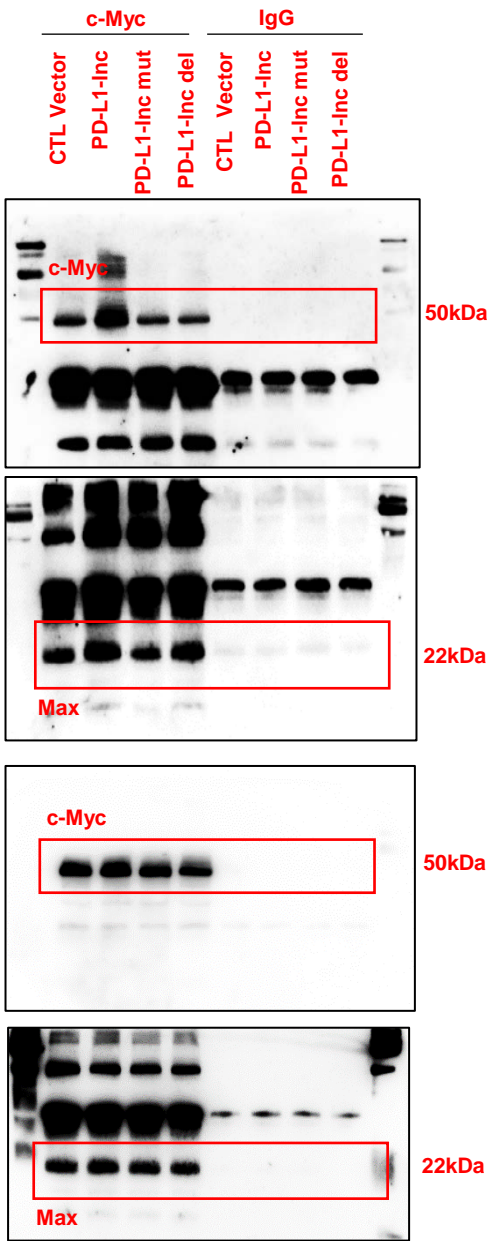

Fig.S13C

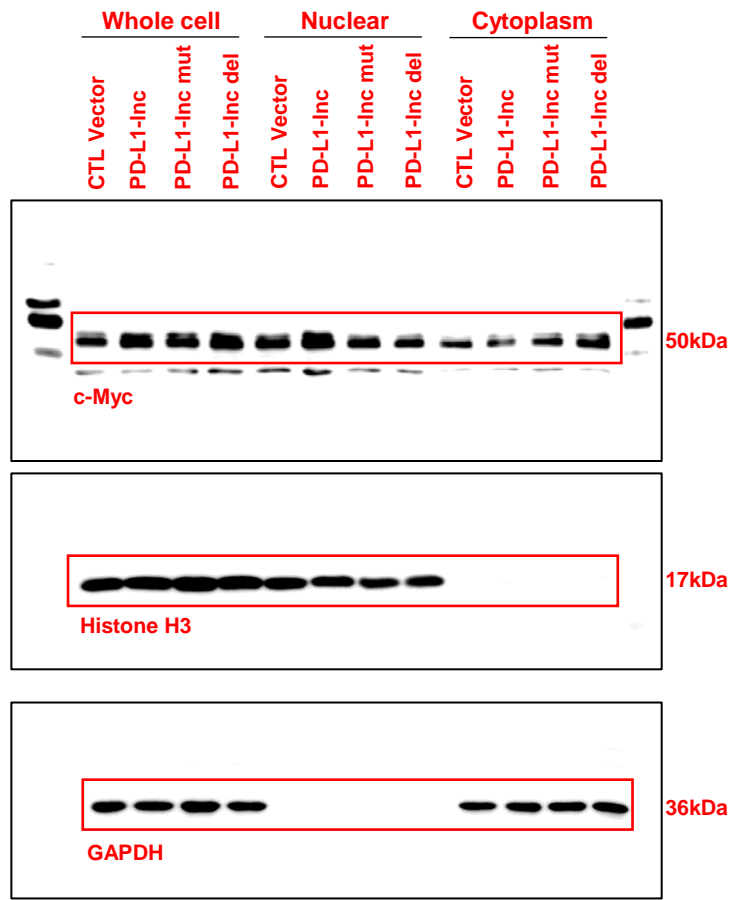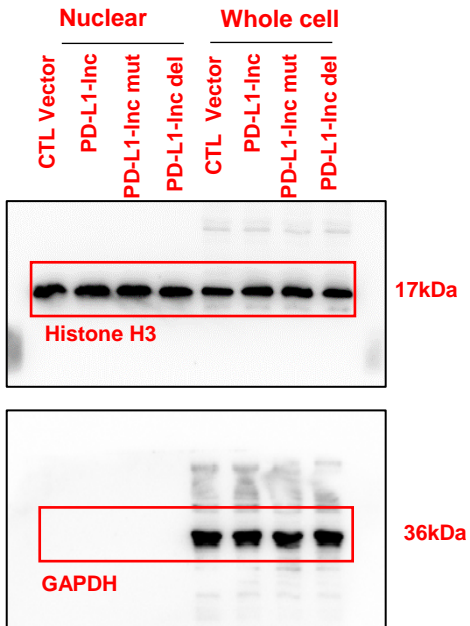

**Fig. S14A**

**A549**

Scramble RNA  
c-Myc siRNA-1  
c-Myc siRNA-2  
c-Myc siRNA-3

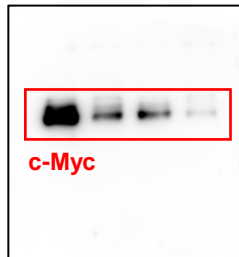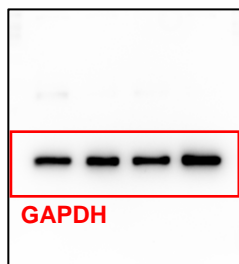

**Fig. S14B**

**PC9**

Scramble RNA  
c-Myc siRNA-1  
c-Myc siRNA-2  
c-Myc siRNA-3

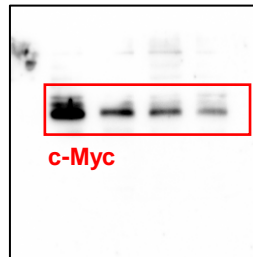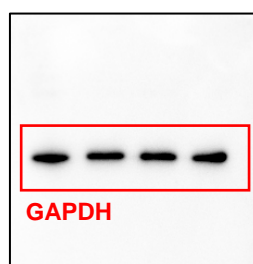



**Fig. S15B**

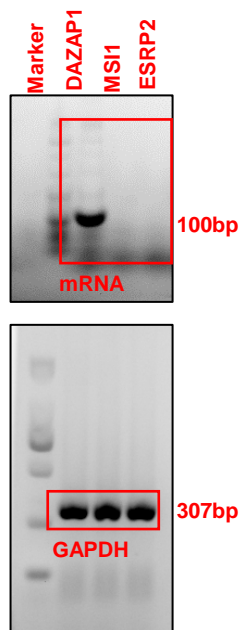

Supplement: 13059_2021_2331_MOESM3_ESM.pdf [file 13059_2021_2331_MOESM3_ESM.pdf]
