# Supplementary material for: PD-L1 lncRNA splice isoform promotes lung adenocarcinoma progression via enhancing c-Myc activity
Source: PubMed Central journal article supplement (PMC8042710; doi:10.1186/s13059-021-02331-0), 2021-04-13
Supplement: 13059_2021_2331_MOESM1_ESM.pdf [file 13059_2021_2331_MOESM1_ESM.pdf]

**Table S1. Clinic characteristics of lung adenocarcinoma patients.**

|                           | <b>PD-L1 Negative</b> | <b>PD-L1 Positive</b> | <b>P value</b> |
|---------------------------|-----------------------|-----------------------|----------------|
| <b>Parameter</b>          |                       |                       |                |
| <b>All patients</b>       | N=212 (77.1%)         | N=63 (22.9%)          |                |
| <b>Age (years)</b>        |                       |                       | <b>0.827</b>   |
| <60                       | 84 (77.8%)            | 24 (22.2%)            |                |
| ≥ 60                      | 128 (76.6%)           | 39 (23.4%)            |                |
| <b>Gender</b>             |                       |                       |                |
| Female                    | 136 (85%)             | 24 (15%)              | <b>0.000</b>   |
| Male                      | 76 (66%)              | 39 (34%)              |                |
| <b>Pathologic stage</b>   |                       |                       |                |
| I                         | 164 (82.4%)           | 35 (17.6%)            | <b>0.001</b>   |
| II-III                    | 48 (70.6%)            | 28 (29.4%)            |                |
| <b>Pathologic T stage</b> |                       |                       |                |
| T1                        | 142 (82.6%)           | 30 (17.4%)            | <b>0.005</b>   |
| T2-T4                     | 70 (68.0%)            | 33 (32.0%)            |                |
| <b>Pathologic N stage</b> |                       |                       |                |
| N0                        | 171 (82.2%)           | 37 (17.8%)            | <b>0.000</b>   |
| N1-N3                     | 41 (62.0%)            | 26 (38.0%)            |                |

**Table S2. List of primers for qRT-PCR.**

| Gene name                      | Primers                 |                         |
|--------------------------------|-------------------------|-------------------------|
|                                | Forward                 | Reverse                 |
| <b>GAPDH</b>                   | TGAACGGGAAGCTCACTGG     | TCCACCACCCTGTTGCTGTA    |
| <b>PD-L1 mRNA primer 1</b>     | AGGCCGAAGTCATCTGGAC     | CTGGGATGACCAATTCAGCT    |
| <b>PD-L1 mRNA/lnc primer 2</b> | TCACGGTTCCCAAGGACCTA    | CCCCGATGAACCCCTAAACC    |
| <b>PD-L1 mRNA primer 3</b>     | CCAGTCACCTCTGAACATG     | TCAGTGTGCTGGTCACATTG    |
| <b>PD-L1-lnc primer 4</b>      | CTGAGTGGAGATTAGATCCTG   | CATCATTCTCCCAAGTGAGTC   |
| <b>SAA2</b>                    | GCTTCTTTTCGTTCCCTGGCG   | GCCGATGTAATTGGCTTCTCTCA |
| <b>OAS2</b>                    | ACGTGACATCCTCGATAAACTG  | GAACCCATCAAGGGACTTCTG   |
| <b>IFI44L</b>                  | ACAGAGCCAAATGATCCCTATG  | TCGATAAACGACACACCAGTTG  |
| <b>SAA4</b>                    | GGCAGAGCCTATTGGGACATA   | GCTGATGAGTTTAGCAGCCC    |
| <b>IFI44</b>                   | ATGGCAGTGACAACTCGTTTG   | TCCTGGTAACTCTTCTGCATA   |
| <b>OASL</b>                    | CTGATGCAGGAAGTGTATAGCAC | CACAGCGTCTAGCACCTCTT    |
| <b>IFITM1</b>                  | CCAAGGTCCACCGTGATTAAC   | ACCAGTTCAAGAAGAGGGTGT   |
| <b>MX2</b>                     | CAGAGGCAGCAGACGATCAAC   | TGGTCAGGATACCGATGGTC    |
| <b>MX1</b>                     | GTTTCCGAAGTGGACATCGCA   | CTGCACAGGTTGTTCTCAGC    |
| <b>COL8A1</b>                  | GCTGCCACCTCAAATTCCTC    | CTTCTTGGGTACGGCTTCCT    |
| <b>IFIT1</b>                   | AGAAGCAGGCAATCACAGAAAA  | CTGAAACCGACCATAGTGGAAT  |
| <b>IFIT3</b>                   | AAAAGCCCAACAACCCAGAAT   | CGTATTGGTTATCAGGACTCAGC |
| <b>SOD2</b>                    | GCTCCGGTTTTGGGGTATCTG   | GCGTTGATGTGAGGTTCCAG    |
| <b>IFITM3</b>                  | ACTGTCCAAACCTTCTTCTCTCC | TCGCCAACCATCTTCCTGTC    |
| <b>IFI6</b>                    | GGTCTGCGATCCTGAATGGG    | TCACTATCGAGATACTTGTGGGT |
| <b>HLA-A</b>                   | GACGCCCCAAAACGCATA      | TGGGCAAACCCTCATGCTG     |
| <b>GFP mRNA</b>                | AAGGACGACGGCAACTACAA    | CGATGTTGTGGCGGATCTTG    |
| <b>MSI1</b>                    | GGGACTCAGTTGGCAGACTAC   | CTGGTCCATGAAAGTGACGAA   |
| <b>ESRP2</b>                   | TTGCAGCAAGGCTGATGTG     | GTTGAGGCAGAGTGCTACACC   |
| <b>DAZAP1</b>                  | AGAAGTTCGGAGTGGTCACG    | ACTGATTGTTTCGTCCTCGAAAG |

**Table S3. List of target sequences of various siRNAs.**

| <b>Gene name</b>       | <b>Target sequence 5'-3'</b> |
|------------------------|------------------------------|
| <b>PD-L1-lnc shRNA</b> | GACTCACTTGGGAGAATGATGGA      |
| <b>c-Myc-si-1</b>      | GAGGAGACATGGTGAACCA          |
| <b>c-Myc-si-2</b>      | GGGTCAAGTTGGACAGTGT          |
| <b>c-Myc-si-3</b>      | CGACGAGACCTTCATCAAA          |
| <b>DAZAP-si-1</b>      | CGGAGGTAGTCATGATCTA          |
| <b>DAZAP-si-2</b>      | CAACCAGTCTCGAGGCTTT          |
