# Supplementary material for: PD-L1 lncRNA splice isoform promotes lung adenocarcinoma progression via enhancing c-Myc activity
Source: PubMed Central journal article supplement (PMC8042710; doi:10.1186/s13059-021-02331-0), 2021-04-13
Supplement: 13059_2021_2331_MOESM2_ESM.pdf [file 13059_2021_2331_MOESM2_ESM.pdf]

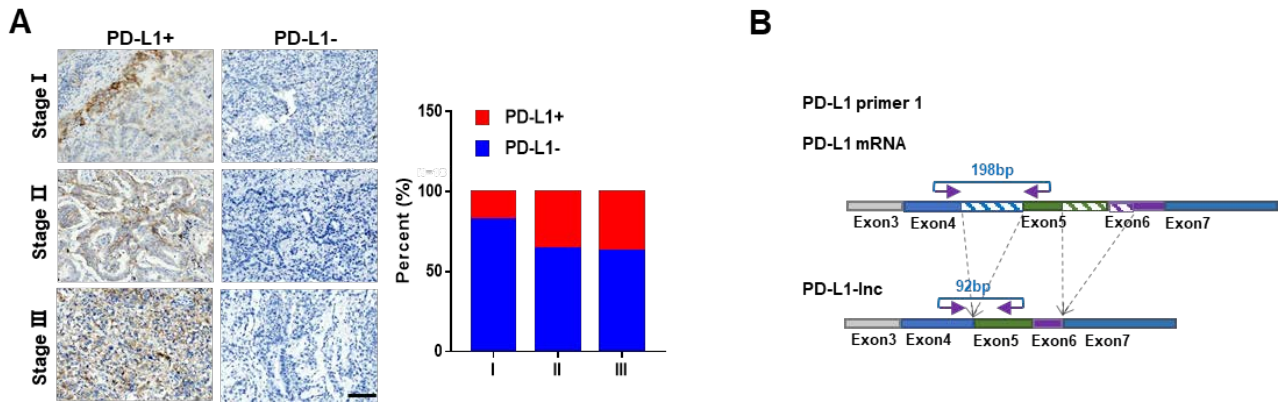

**Figure S1. The PD-L1 protein level in human lung cancer tissue. (A)** Immunohistochemical staining for PD-L1 in human lung cancer tissue sections. Left: representative image; Right: quantitative analysis. Tumors were classified into three stages (Stage I, II and III) according to the 7th edition of the American Joint Committee on Cancer Staging Manual 17. Scale bar, 100 $\mu$ m. **(B)** The schematic of primer for amplification of PD-L1 mRNA.

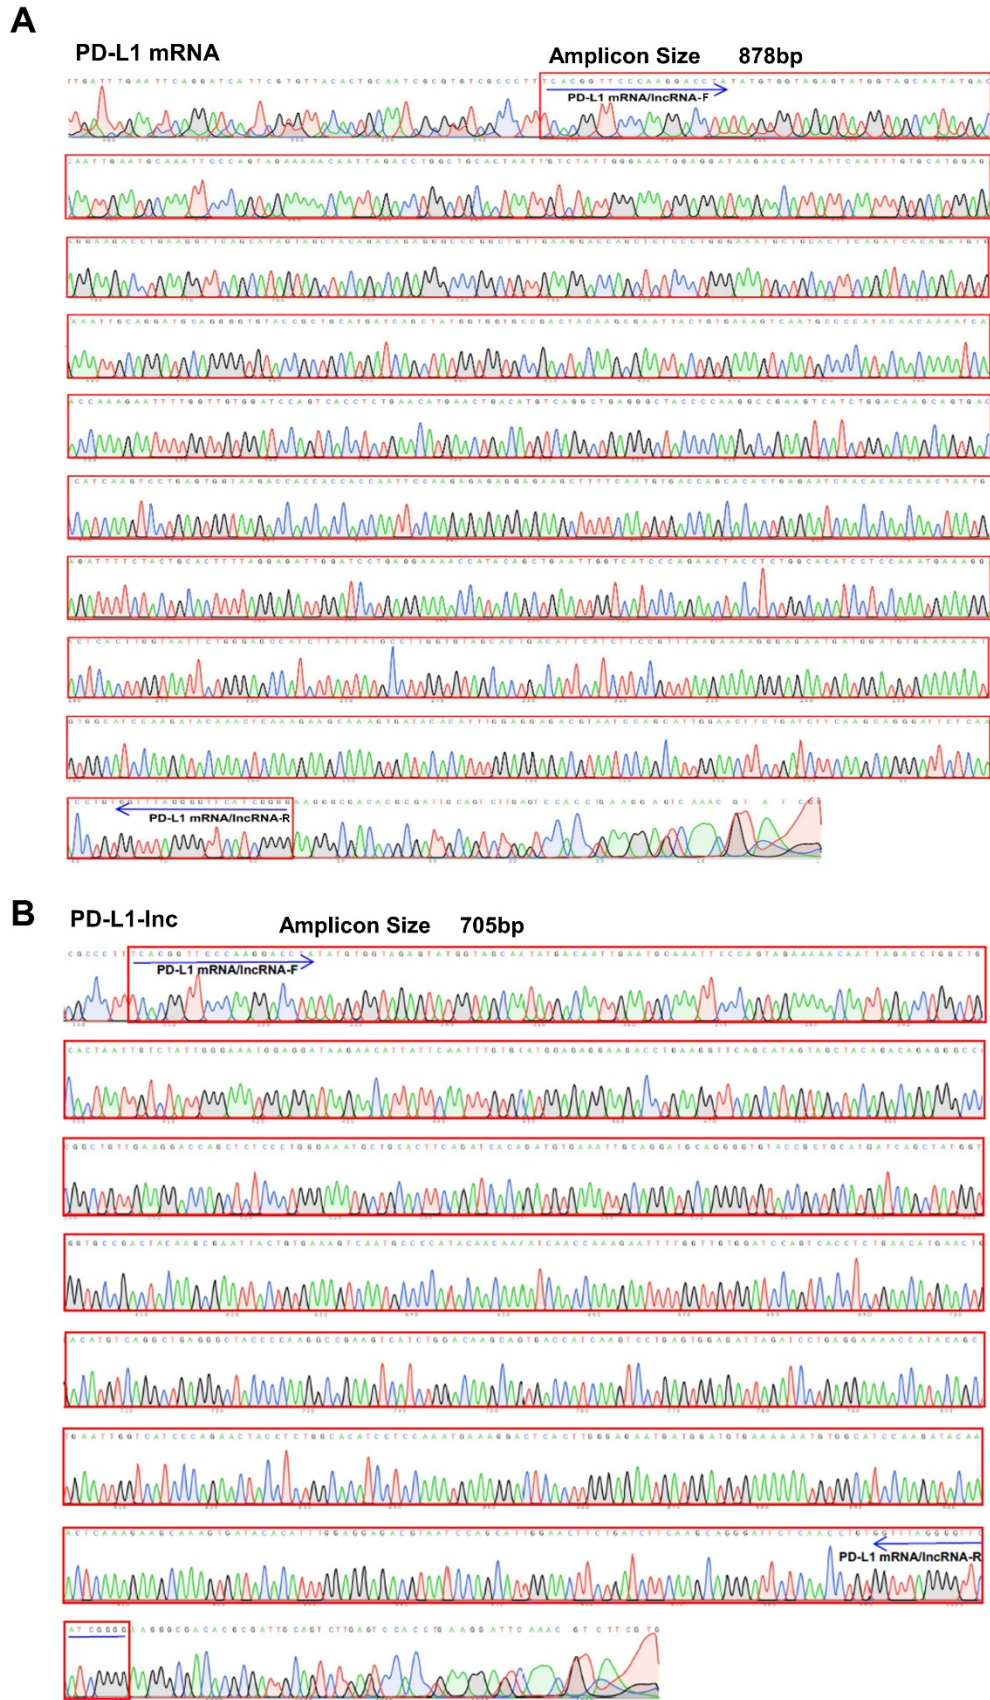

**Figure S2.** The Sanger sequencing results of the (A) PD-L1 mRNA (878bp band) and (B) PD-L1 IncRNA (705bp band) obtained by RT-PCR.

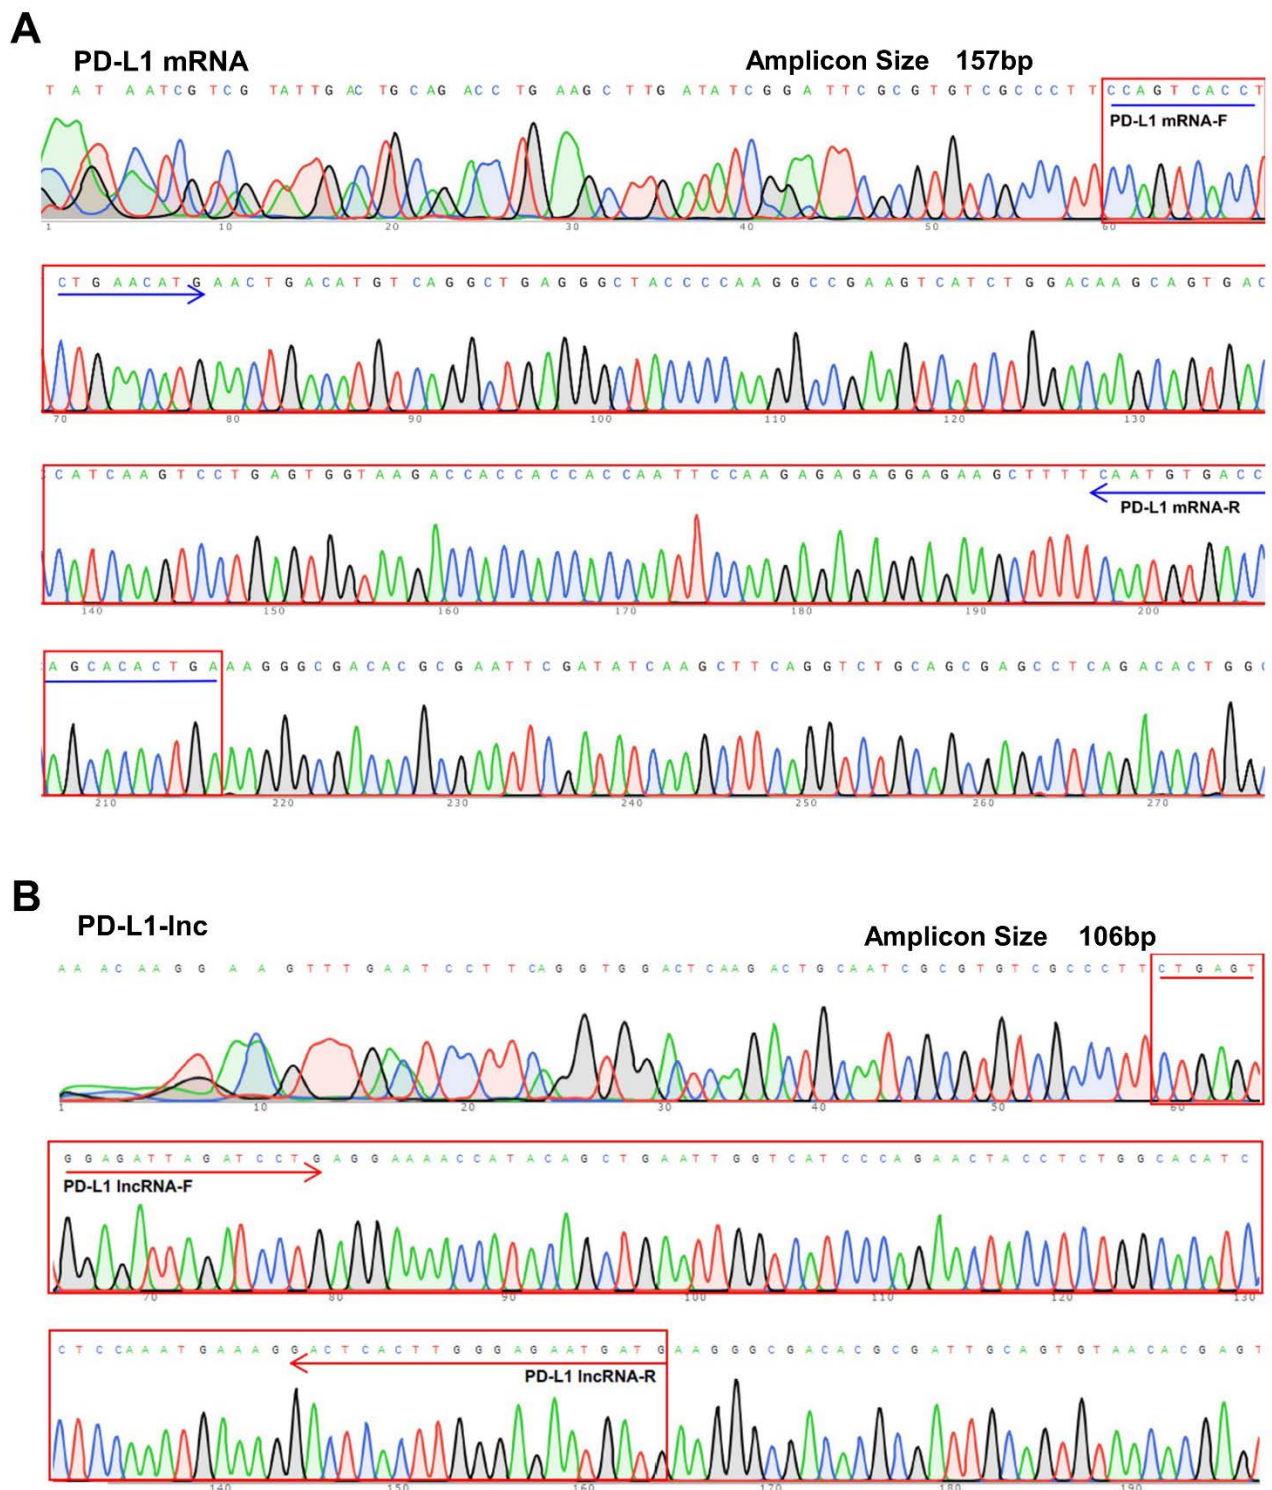

**Figure S3.** The Sanger sequencing results of (A) PD-L1 mRNA (157bp band) and (B) PD-L1 lncRNA (106bp band) obtained by qRT-PCR with specific primers.

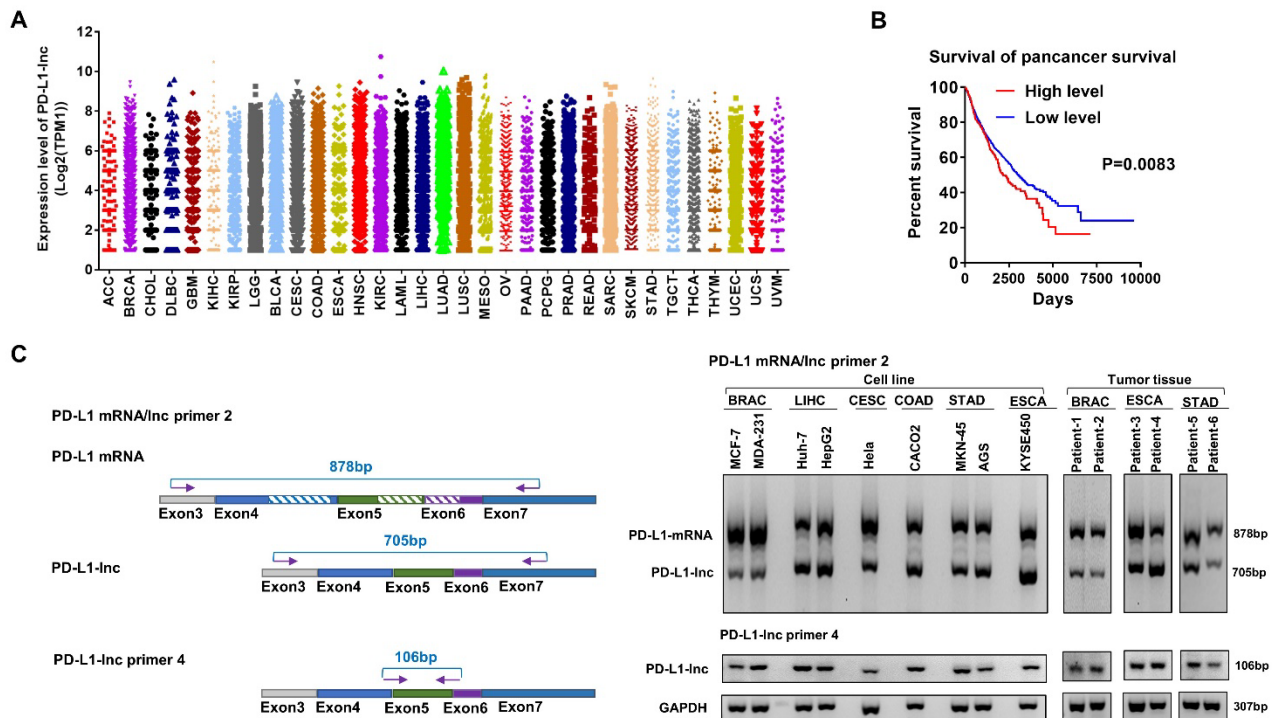

**Figure S4. Expression of PD-L1-lnc in various cancers.** (A) Pan-cancer analysis of PD-L1-lnc expression in TCGA database. (B) PD-L1-lnc as a predictor of cancer survival in TCGA database. (C) Left, the schematic of primer for amplification of PD-L1 mRNA and PD-L1-lnc; Right, the agarose gel of the PD-L1 mRNA and PD-L1-lnc in BRAC, LIHC, CESC, COAD, STAD and ESCA cancer cell lines and BRAC, ESCA and STAD cancer tissues by RT-PCR with specific primers. **ACC**: Adrenocortical carcinoma; **BRCA**: Breast invasive carcinoma; **CHOL**: Cholangiocarcinoma; **DLBC**: Lymphoid neoplasm diffuse large B-cell lymphoma; **GBM**: Glioblastoma multiforme; **KICH**: Kidney chromophobe; **KIRP**: Kidney renal papillary cell carcinoma; **LGG**: Brain lower grade glioma; **BLCA**: Bladder urothelial carcinoma; **CESC**: Cervical squamous cell carcinoma and endocervical adenocarcinoma; **COAD**: Colon adenocarcinoma; **ESCA**: Esophageal carcinoma; **HNSC**: Head and neck squamous cell carcinoma; **KIRC**: Kidney renal clear cell carcinoma; **LAML**: Acute myeloid leukemia; **LIHC**: Liver hepatocellular carcinoma; **LUAD**: Lung adenocarcinoma; **LUSC**: Lung squamous cell carcinoma; **MESO**: Mesothelioma; **OV**: Ovarian serous cystadenocarcinoma; **PAAD**: Pancreatic adenocarcinoma; **PCPG**: Pheochromocytoma and paraganglioma; **PRAD**: Prostate adenocarcinoma; **READ**: Rectum adenocarcinoma; **SARC**: Sarcoma; **SKCM**: Skin cutaneous melanoma; **STAD**: Stomach adenocarcinoma; **TGCT**: Testicular germ cell tumors; **THCA**: Thyroid carcinoma; **THYM**: Thymoma; **UCEC**: Uterine corpus endometrial carcinoma; **UCS**: Uterine carcinosarcoma; **UVM**: Uveal Melanoma.

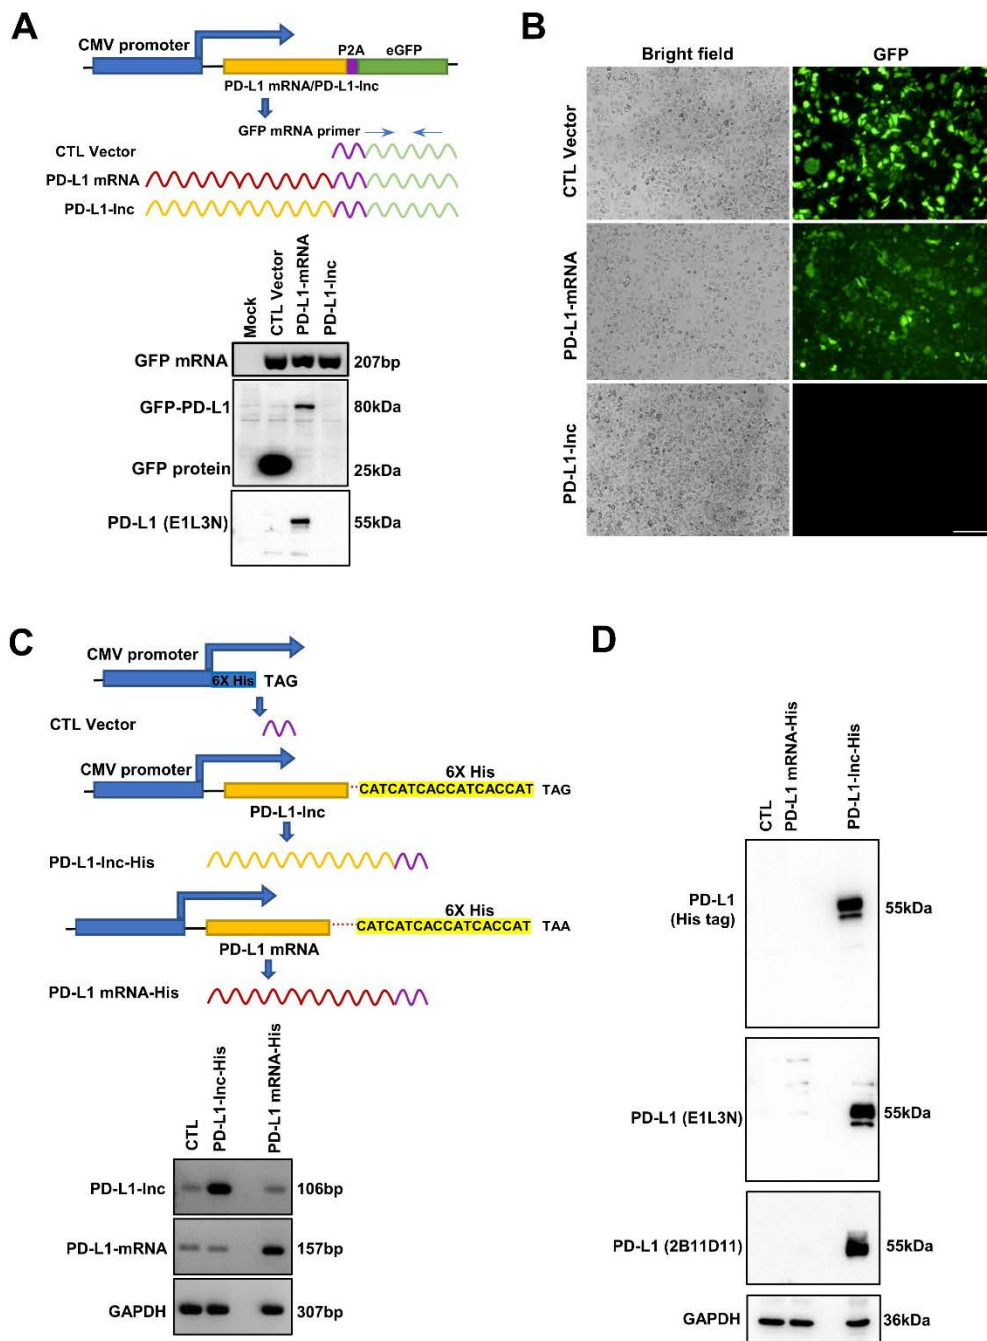

**Figure S5. PD-L1-INC is a long non-coding RNA fragment.** (A) Linking PD-L1-INC or PD-L1-mRNA with GFP mRNA to generate the ‘recombinant’ GFP expression vector. (B) GFP expression detected by fluorescence microscopy in A549 cells that were transfected with GFP expression or ‘recombinant’ GFP expression vectors. Scale bar, 200µm. (C) Preparation of vectors expressing His-tagged recombinant proteins. (D) His-tag and PD-L1 protein expression detected by Western blotting in A549 cells. PD-L1-INC overexpression vector: PD-L1-INC; PD-L1 overexpression vector: PD-L1-mRNA; control vector: CTL Vector.

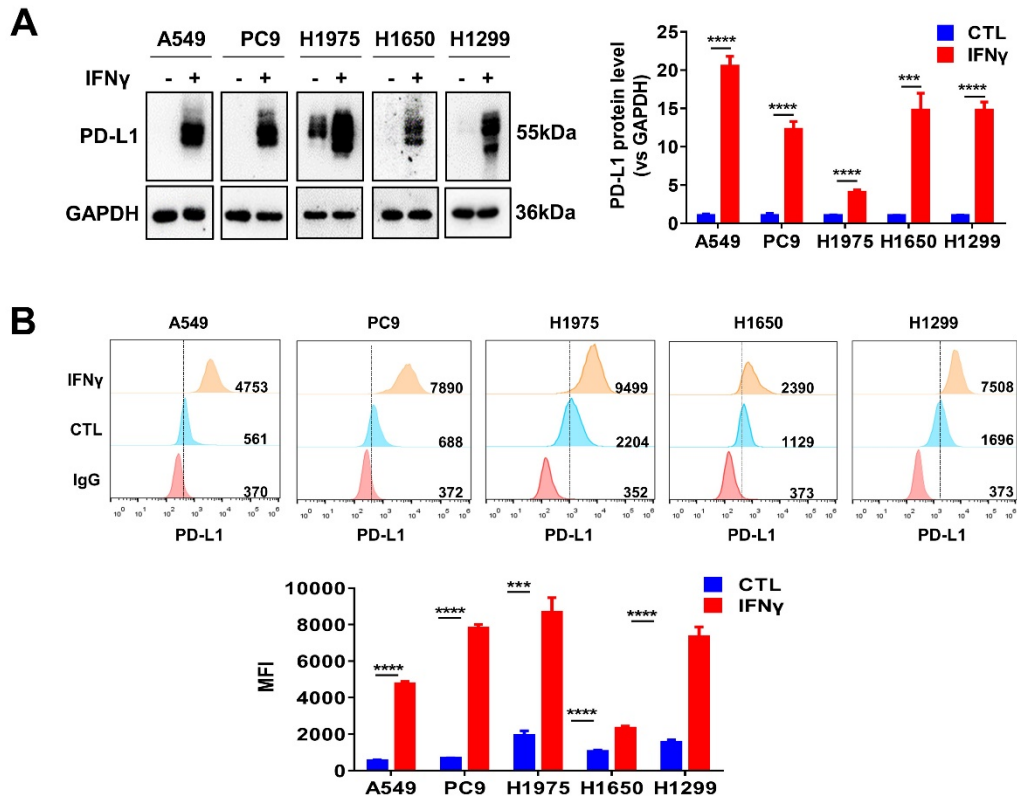

**Figure S6. Induction of PD-L1 by IFN $\gamma$  in lung adenocarcinoma cells.** (A) The expression level of PD-L1 protein in lung adenocarcinoma cells with or without IFN $\gamma$  stimulation determined by Western blotting. (B) The expression level of PD-L1 protein in lung adenocarcinoma cells with or without IFN $\gamma$  stimulation determined by flow cytometry. In A-B, left: representative image; right: quantitative analysis. \*\*\* $P < 0.001$ ; \*\*\*\* $P < 0.0001$ .

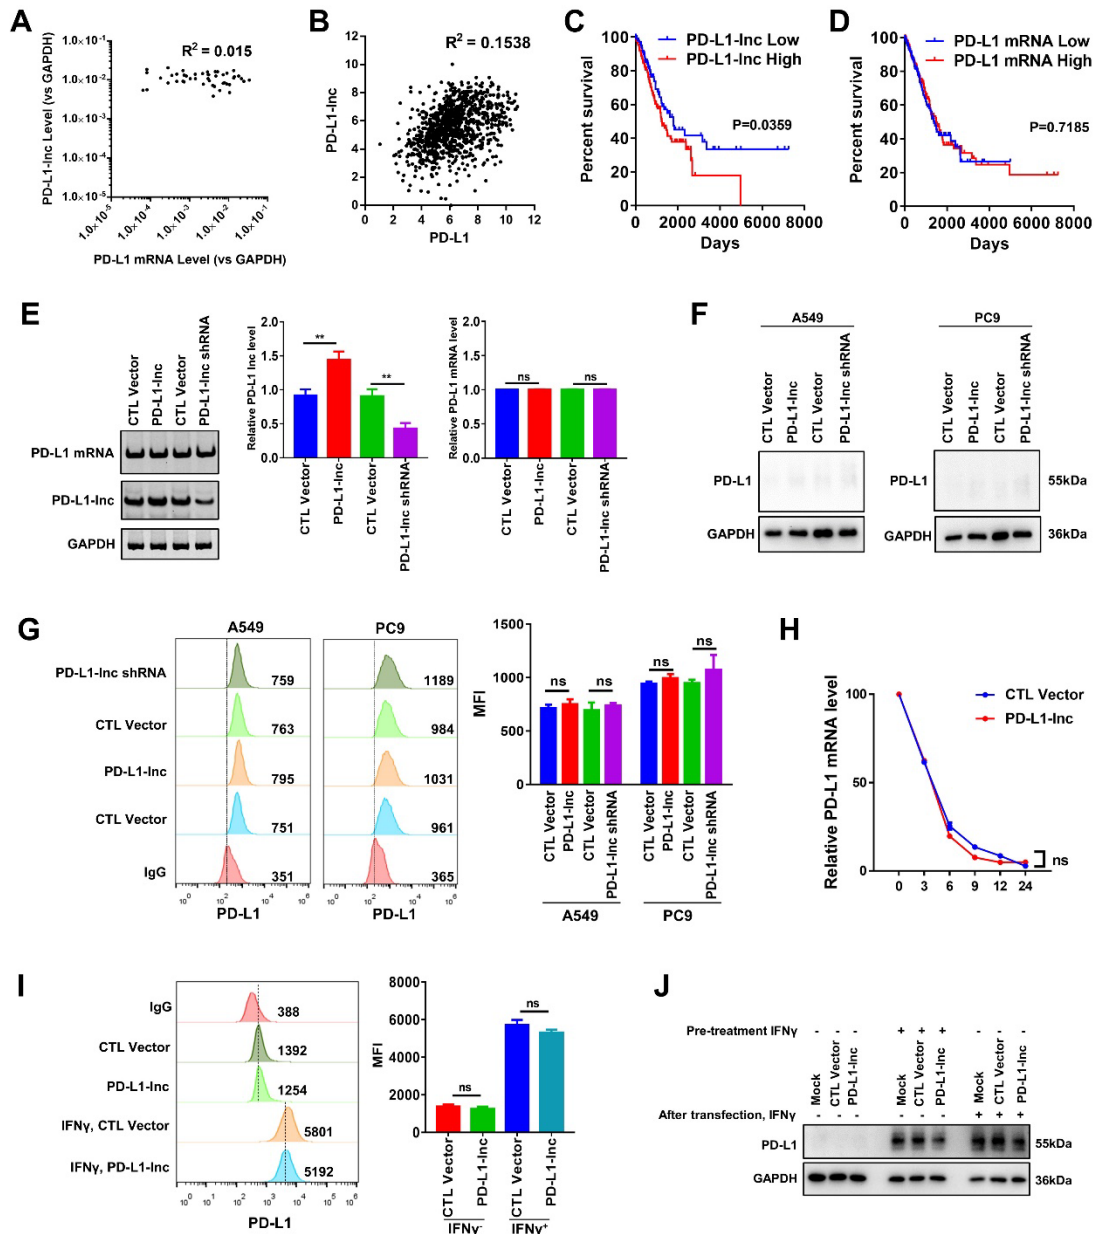

**Figure S7. PD-L1-lnc has no effect on PD-L1 mRNA and protein expression.** (A) Relative expression of the PD-L1-lnc and PD-L1 mRNA in PD-L1 positive and negative lung adenocarcinoma tissues. (B) Relative expression of the PD-L1-lnc and PD-L1 mRNA in lung adenocarcinoma data set of TCGA. (C-D) Kaplan-Meier survival analysis of lung adenocarcinoma patients stratified by PD-L1-lnc (C) and PD-L1 mRNA (D) expression in TCGA database. (E) The expression of PD-L1 lncRNA and mRNA in A549 cells transfected with PD-L1-lnc overexpression vector or PD-L1-lnc shRNA vector. (F-G) Western blotting (F) and Flow cytometry (G) analysis of PD-L1 protein level in A549 and PC9 cells transfected with PD-L1-lnc overexpression vector or PD-L1-lnc shRNA vector. (H) The half-life of PD-L1 mRNA in A549 cells transfected with PD-L1-lnc overexpression vector or control vector. (I-J) Flow cytometry (I) and Western blotting (J) analysis of PD-L1 protein levels in A549 cells transfected with PD-L1-lnc overexpression vector or control vector in the presence or absence of IFN $\gamma$ . PD-L1-lnc overexpression vector: PD-L1-lnc; control vector: CTL Vector. \*\* $P < 0.01$ .

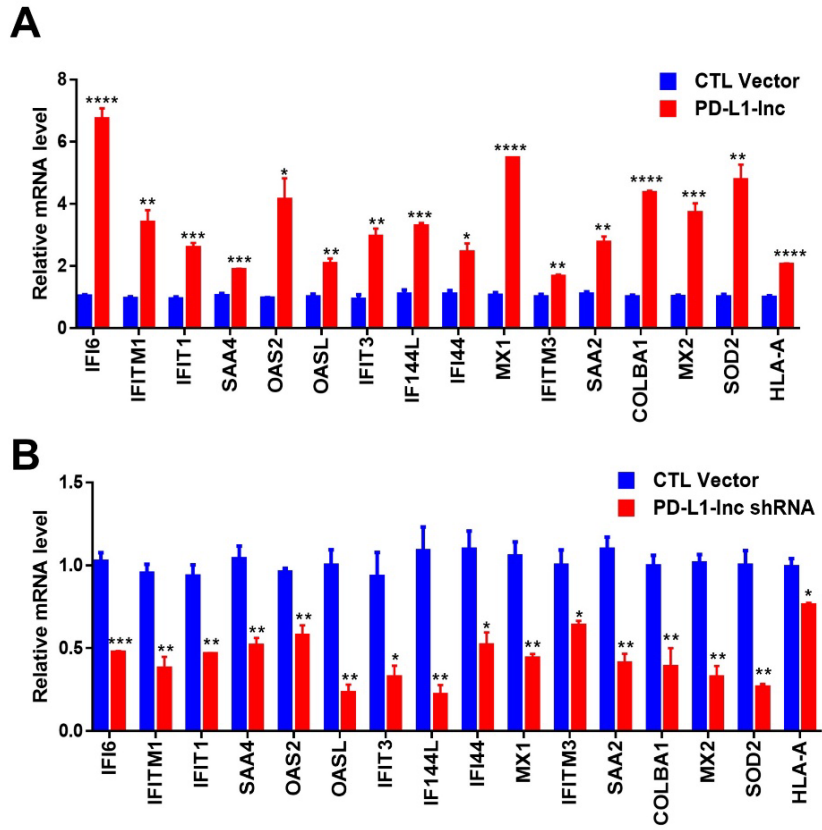

**Figure S8. Expression level of genes within the c-Myc signaling downstream in lung cancer xenograft.**  
 \*P < 0.05; \*\*P < 0.01; \*\*\*P < 0.001; \*\*\*\*P < 0.0001.



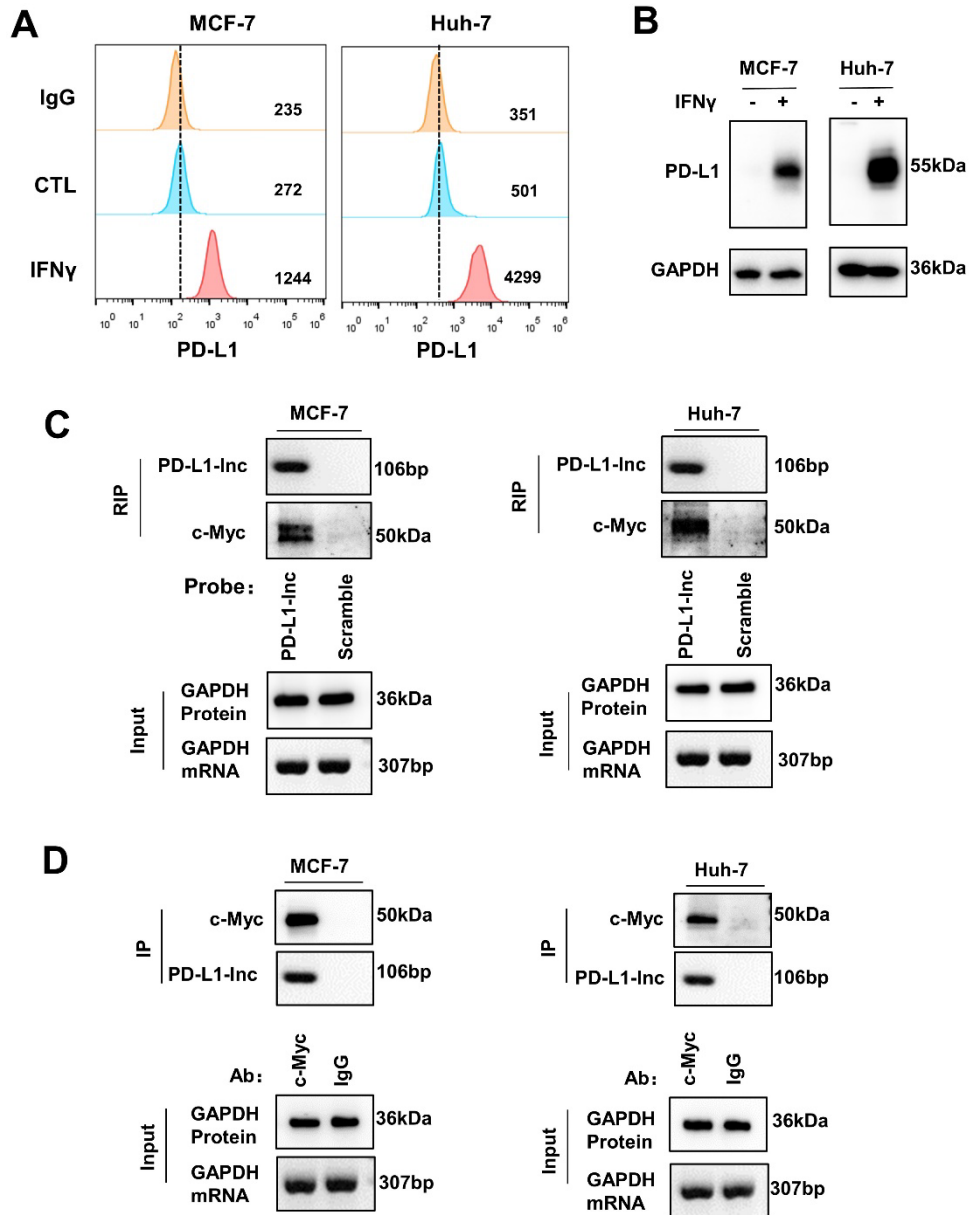

**Figure S9. PD-L1-lnc binds to c-Myc.** (A-B) The expression level of PD-L1 protein in MCF-7 and Huh-7 cancer cell line with or without IFN $\gamma$  stimulation assessed by flow cytometry and Western blotting analysis. (C) Immunoprecipitation of PD-L1-lnc in MCF-7 and Huh-7 cells using biotinylated antisense probes against PD-L1-lnc to detect the PD-L1-lnc-associated c-Myc. (D) Immunoprecipitation of c-Myc in MCF-7 and Huh-7 cells using anti-c-Myc antibody and Protein A/G beads to detect the c-Myc-associated PD-L1-lnc.

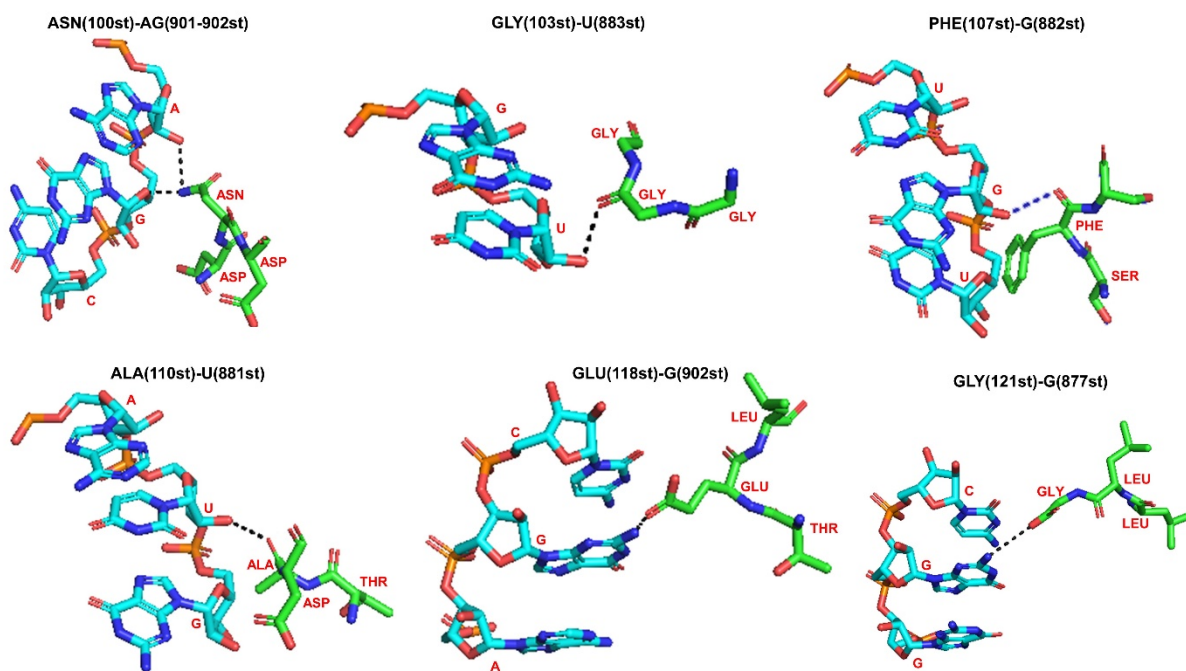

**Figure S10. Graphical representation images of the binding interface of the docking models of PD-L1-lnc with c-Myc by NPDock. Black dashes represent hydrogen bond.**

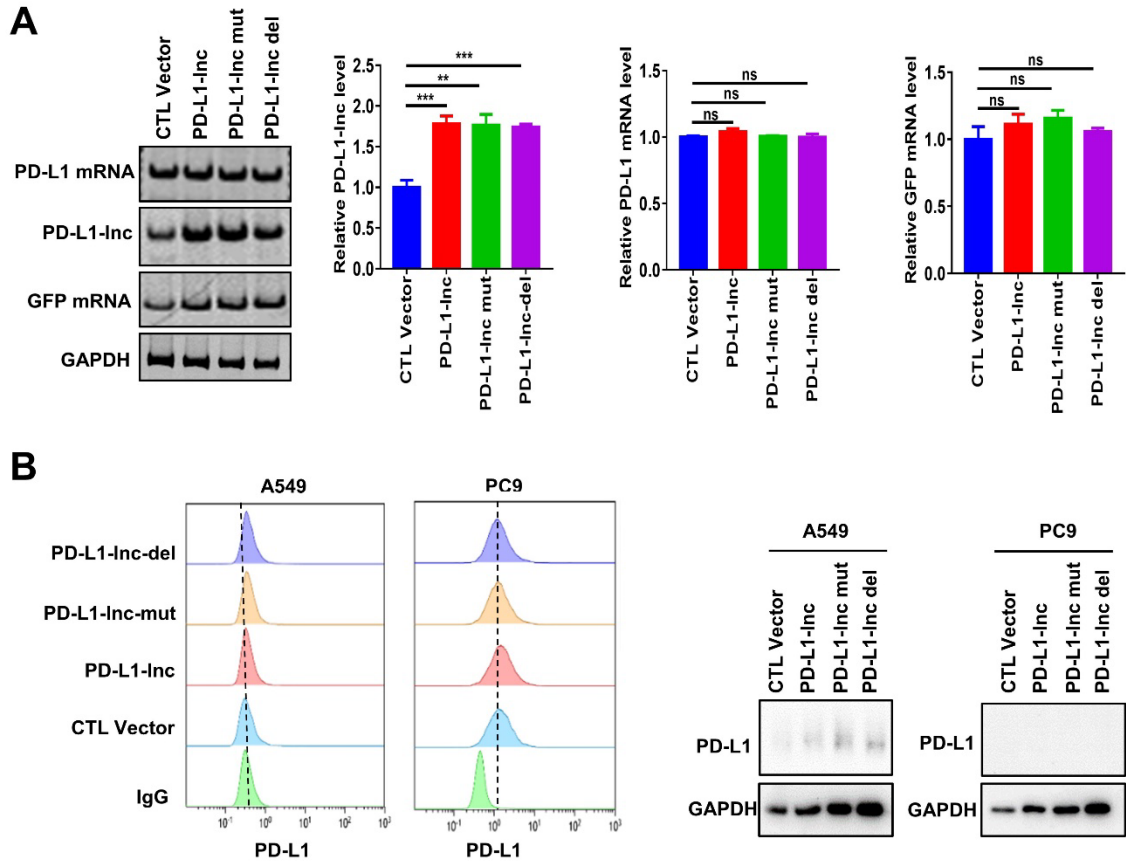

**Figure S11. The expression of PD-L1 lncRNA and mRNA in A549 cells transfected with the mutant vector and wild type vector. (A)** Agarose gel analysis of the expression of PD-L1 lncRNA and mRNA in A549 cells transfected with the mutant vectors and wild type vector. **(B)** Flow cytometry (left) and western blotting (right) analysis of the expression of PD-L1 protein in A549 cells transfected with the mutant or wild type PD-L1 vector. PD-L1-lnc overexpression vector: PD-L1-lnc; control vector: CTL Vector. \*\* $P < 0.01$ ; \*\*\* $P < 0.001$ .

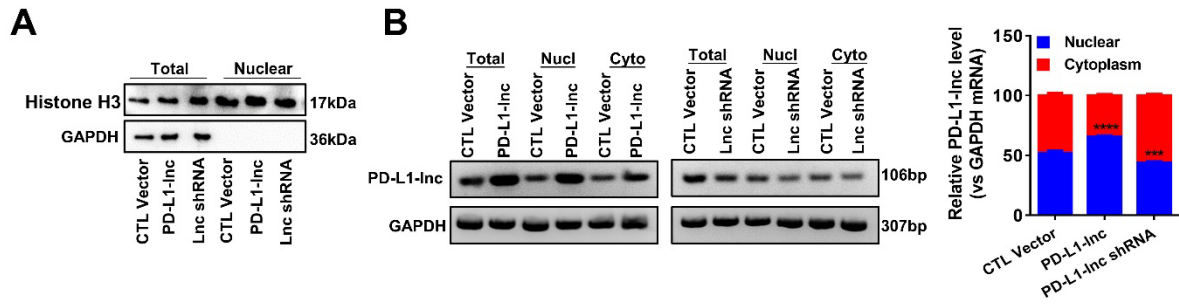

**Figure S12. Cell fraction assay.** (A) Identify the purity of nuclear isolation by Western blotting. (B) Cellular distribution of PD-L1-lnc in A549 cells transfected with PD-L1-lnc-expressing vector (PD-L1-lnc), PD-L1-lnc shRNA-expressing vector (PD-L1-lnc shRNA) or control vector. Left: representative image; Right: quantitative analysis. \*\*\* $P < 0.001$ ; \*\*\*\* $P < 0.0001$ .

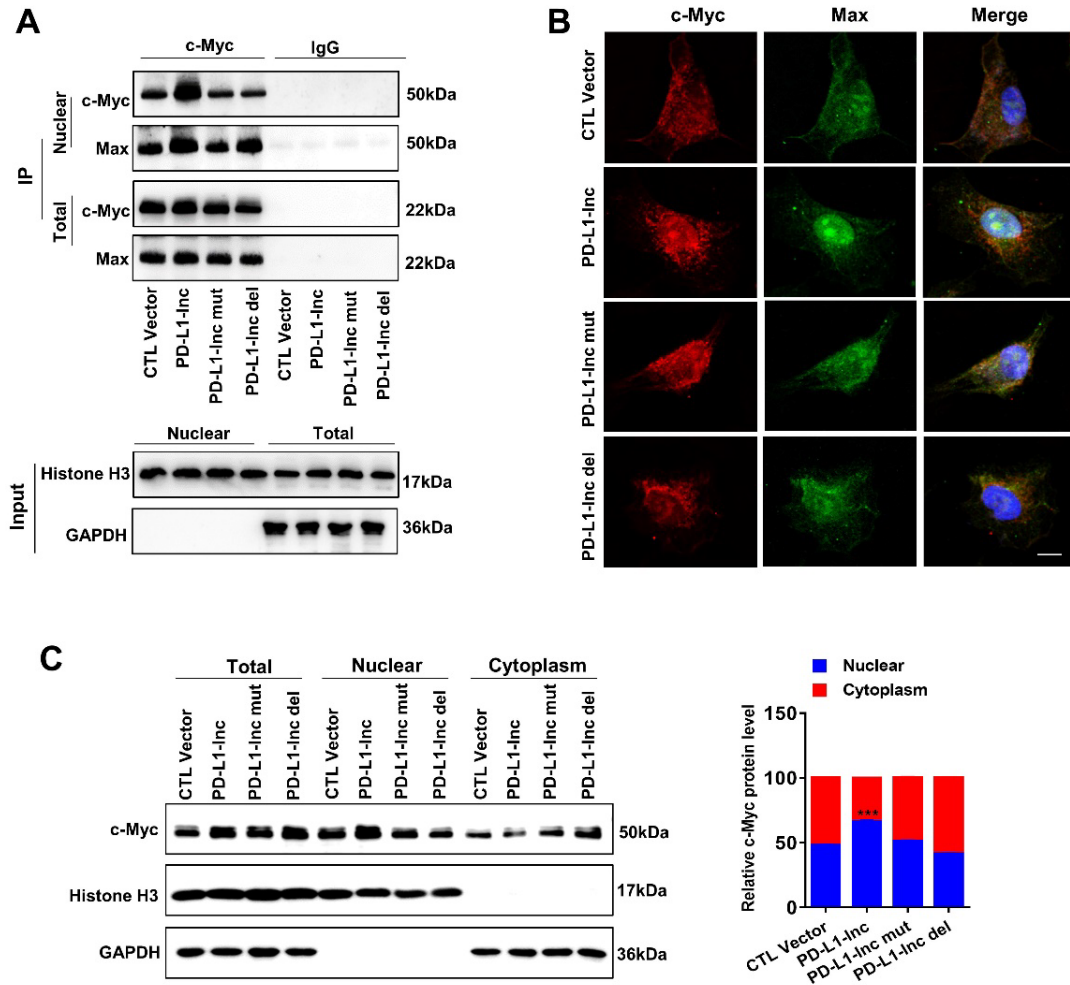

**Figure S13. Binding of PD-L1-lnc to c-Myc enhances the association of c-Myc with MAX and promotes the entry of c-Myc into nucleus.** (A) Pulldown of PD-L1-lnc in A549 cells transfected with WT, PD-L1-lnc mutant, or PD-L1-lnc del vector using biotinylated antisense probes against GFP mRNA to detect the binding of PD-L1-lnc with c-Myc. (B) Binding of PD-L1-lnc with c-Myc and Max in A549 cells transfected with WT, PD-L1-lnc mutant or PD-L1-lnc del vector assessed by Immunofluorescence analysis. Scale bar, 10µm. (C) Western blot analysis of c-Myc distribution in A549 cells transfected with WT, PD-L1-lnc mutant or PD-L1-lnc del vector. Note that PD-L1-lnc overexpression markedly increases the distribution of c-Myc in A549 cell nuclear fraction, while the PD-L1-lnc mutant and PD-L1-lnc del vector had no effect on the distribution of c-Myc.

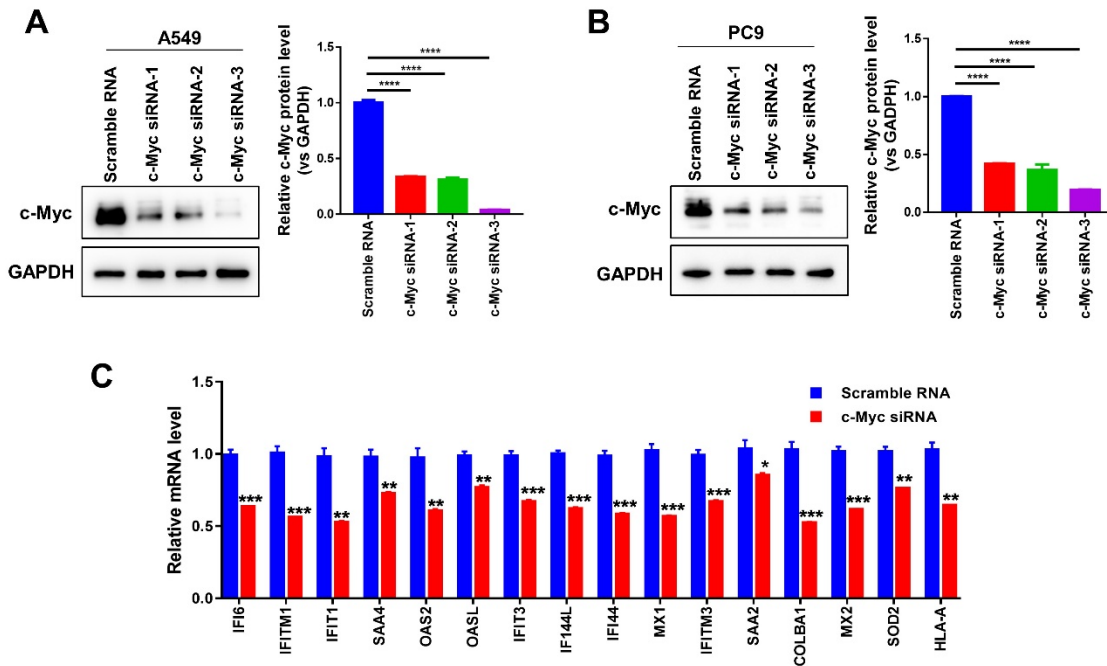

**Figure S14. The influence of c-Myc siRNA on gene expression in lung cancer A549 and PC9 cells. (A-B)** The efficiency of c-Myc siRNA to knock down c-Myc expression in A549 (A) and PC9 (B) cells assessed by Western blotting. **(C)** Expression level of genes associated with c-Myc signal downstream in A549 cells with or without c-Myc siRNA treatment. \* $P < 0.05$ ; \*\* $P < 0.01$ ; \*\*\* $P < 0.001$ ; \*\*\*\* $P < 0.0001$ .

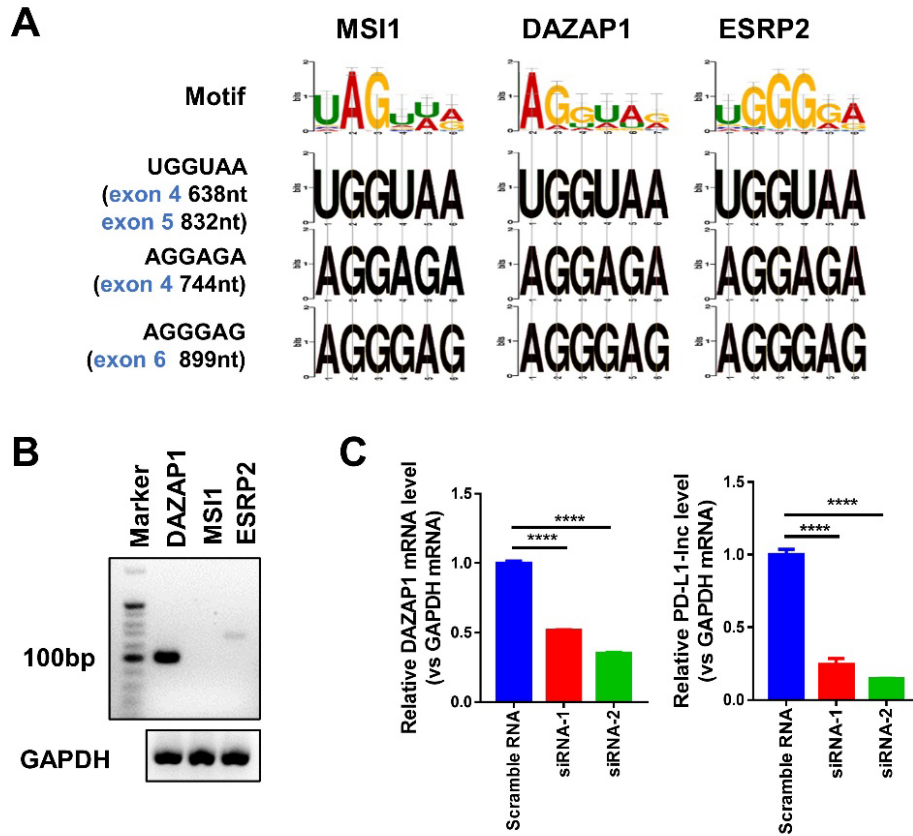

**Figure S15. The effect of DAZAP1 on the generation of PD-L1-inc.** (A) The motif of MSI1, DAZAP1 and ESRP2 and alternative splicing site of PD-L1. (B) The efficiency of DAZAP1 siRNA on DAZAP1 reduction. (C) The expression level of DAZAP1 mRNA (left) and PD-L1-inc (right) in A549 cells transfected with siRNAs to DAZAP1. \*\*\*\* $P < 0.0001$ .
